# Supplementary material for: Vitellogenin-like A–associated shifts in social cue responsiveness regulate behavioral task specialization in an ant
Source: PubMed Central journal article supplement (PMC5991380; doi:10.1371/journal.pbio.2005747), 2018-06-06

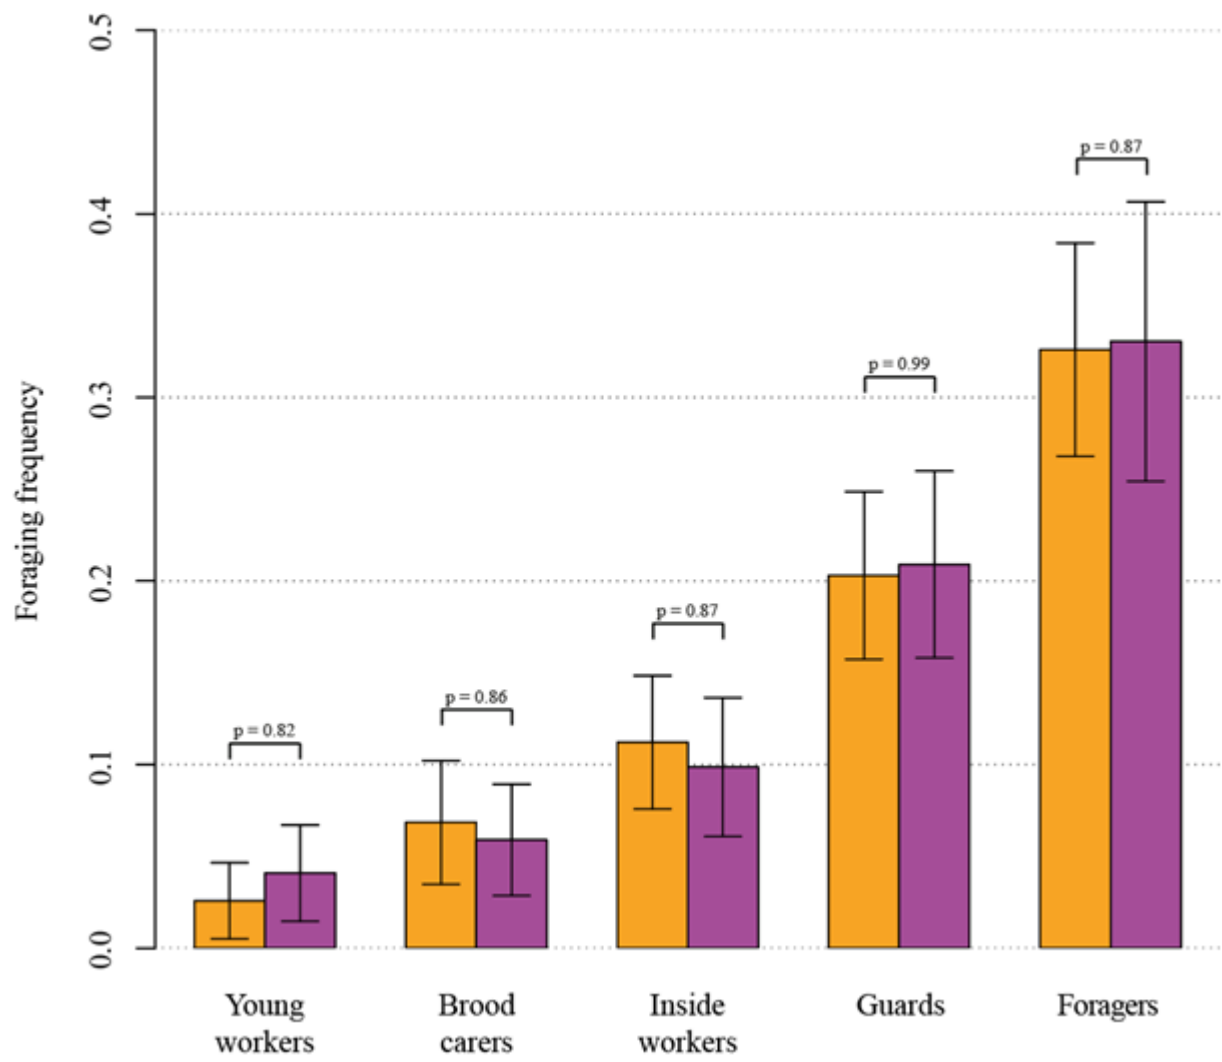

Supplement: pbio.2005747.s002.pdf [file pbio.2005747.s002.pdf]
