# Supplementary material for: Vitellogenin-like A–associated shifts in social cue responsiveness regulate behavioral task specialization in an ant
Source: PubMed Central journal article supplement (PMC5991380; doi:10.1371/journal.pbio.2005747), 2018-06-06
Supplement: pbio.2005747.s009.pdf [file pbio.2005747.s009.pdf]

| <b>Species</b>                 | <b>Conventional<br/>Vg</b> | <b>Vg-<br/>like A</b> | <b>Vg-<br/>like B</b> | <b>Vg-<br/>like C</b> | <b>Myrmicine<br/>Vg</b> | <b>Unclustered<br/>Vg</b> |
|--------------------------------|----------------------------|-----------------------|-----------------------|-----------------------|-------------------------|---------------------------|
| <i>Acromyrmex echinator</i>    | 2                          | 1                     | 1                     | 1                     | 2                       | 0                         |
| <i>Anopheles gambiae</i>       | 2                          | 1                     | 1                     | 0                     | 0                       | 0                         |
| <i>Atta cephalotes</i>         | 1                          | 1                     | 1                     | 1                     | 1                       | 0                         |
| <i>Atta colombica</i>          | 1                          | 1                     | 1                     | 1                     | 0                       | 0                         |
| <i>Apis mellifera</i>          | 1                          | 1                     | 1                     | 1                     | 0                       | 0                         |
| <i>Bombus terrestris</i>       | 1                          | 1                     | 3                     | 0                     | 0                       | 0                         |
| <i>Bombyx mori</i>             | 1                          | 0                     | 1                     | 0                     | 0                       | 0                         |
| <i>Camponotus floridanus</i>   | 1                          | 1                     | 1                     | 1                     | 0                       | 0                         |
| <i>Cardiocondyla obscurior</i> | 0                          | 1                     | 1                     | 1                     | 0                       | 1                         |
| <i>Ooceraea biroi</i>          | 2                          | 1                     | 1                     | 1                     | 0                       | 0                         |
| <i>Cyphomyrmex costatus</i>    | 1                          | 1                     | 1                     | 1                     | 1                       | 0                         |
| <i>Dinoponera quadriceps</i>   | 0                          | 1                     | 1                     | 1                     | 0                       | 1                         |
| <i>Drosophila melanogaster</i> | 0                          | 0                     | 0                     | 0                     | 0                       | 1                         |
| <i>Dufourea novaeangliae</i>   | 1                          | 1                     | 1                     | 0                     | 0                       | 0                         |
| <i>Formica exsecta</i>         | 1                          | 1                     | 1                     | 1                     | 0                       | 0                         |
| <i>Habropoda labori</i>        | 1                          | 1                     | 1                     | 0                     | 0                       | 0                         |
| <i>Harpegnathos saltator</i>   | 0                          | 1                     | 1                     | 1                     | 0                       | 1                         |
| <i>Lasius niger</i>            | 1                          | 1                     | 1                     | 1                     | 0                       | 0                         |

|                                     |   |   |   |   |   |   |
|-------------------------------------|---|---|---|---|---|---|
| <i>Linepithema humile</i>           | 5 | 1 | 1 | 1 | 0 | 0 |
| <i>Megachile rotundata</i>          | 1 | 1 | 1 | 1 | 0 | 0 |
| <i>Melipona quadrifasciata</i>      | 1 | 1 | 0 | 0 | 0 | 0 |
| <i>Monomorium pharaonis</i>         | 3 | 1 | 1 | 1 | 1 | 0 |
| <i>Nasonia vitripennis</i>          | 2 | 1 | 0 | 1 | 0 | 0 |
| <i>Pediculus humanus</i>            | 1 | 0 | 0 | 0 | 0 | 0 |
| <i>Pogonomyrmex barbatus</i>        | 1 | 1 | 1 | 1 | 1 | 0 |
| <i>Polistes dominula</i>            | 1 | 1 | 1 | 0 | 0 | 0 |
| <i>Solenopsis invicta</i>           | 2 | 1 | 1 | 1 | 2 | 0 |
| <i>Temnothorax longispinosus</i>    | 1 | 1 | 1 | 1 | 2 | 0 |
| <i>Trachymyrmex cornetzi</i>        | 1 | 1 | 1 | 2 | 1 | 0 |
| <i>Trachymyrmex septentrionalis</i> | 2 | 1 | 1 | 2 | 2 | 0 |
| <i>Trachymyrmex zeteki</i>          | 1 | 1 | 1 | 2 | 1 | 0 |
| <i>Tribolium castaneum</i>          | 2 | 1 | 0 | 0 | 0 | 0 |
| <i>Vollenhovia emeryi</i>           | 4 | 2 | 2 | 2 | 2 | 0 |
| <i>Wasmannia auropunctata</i>       | 2 | 1 | 1 | 2 | 2 | 0 |
