# Supplementary material for: Vitellogenin-like A–associated shifts in social cue responsiveness regulate behavioral task specialization in an ant
Source: PubMed Central journal article supplement (PMC5991380; doi:10.1371/journal.pbio.2005747), 2018-06-06
Supplement: pbio.2005747.s010.pdf [file pbio.2005747.s010.pdf]

| <b>Species</b>     | <b>Sequence ID</b> | <b>Annotation of<br/>first ORF</b> | <b>Cluster of<br/>first ORF</b> | <b>Annotation of<br/>second ORF</b> | <b>Cluster of<br/>second ORF</b> |
|--------------------|--------------------|------------------------------------|---------------------------------|-------------------------------------|----------------------------------|
| <i>P. barbatus</i> | >Pbar_Yp1-1        | <i>Vg1</i>                         | <i>VgM</i>                      | <i>Vg2</i>                          | <i>VgC</i>                       |
| <i>T. cornetzi</i> | >XP_018374343.1    | <i>Vg2</i>                         | <i>VgM</i>                      | <i>Vg1</i>                          | <i>VgC</i>                       |
| <i>V. emeryi</i>   | >XP_011879089.1    | <i>Vg1</i>                         | <i>VgM</i>                      | <i>Vg3</i>                          | <i>VgC</i>                       |
