# Supplementary material for: Vitellogenin-like A–associated shifts in social cue responsiveness regulate behavioral task specialization in an ant
Source: PubMed Central journal article supplement (PMC5991380; doi:10.1371/journal.pbio.2005747), 2018-06-06
Supplement: pbio.2005747.s012.pdf [file pbio.2005747.s012.pdf]

| <b>Fragment</b>             | <b>Direction</b> | <b>Sequence</b>             |
|-----------------------------|------------------|-----------------------------|
| <i>Vg-like A</i> fragment 1 | Sense            | CCAUCAACAGGCUACAGCAUACUAU   |
|                             | Antisense        | AUAGUAUGCUGUAGCCUGUUGAUGGUU |
| <i>Vg-like A</i> fragment 2 | Sense            | CCAUGAAUUGCGUCCGUGAGACUUU   |
|                             | Antisense        | AAAGUCUCACGGACGCAAUUCAUGGUU |
| <i>Vg-like A</i> fragment 3 | Sense            | CGAGUACGUUCAAGUUCCUUUGCAG   |
|                             | Antisense        | CUGCAAAGGAACUUGAACGUACUCGUA |
| Nonsense                    | Sense            | UAGUACACGUCAUUGGAAUUGCAGC   |
|                             | Antisense        | GCUGCAAUCCAAUGACGUGUACUAUU  |
