# Supplementary material for: Vitellogenin-like A–associated shifts in social cue responsiveness regulate behavioral task specialization in an ant
Source: PubMed Central journal article supplement (PMC5991380; doi:10.1371/journal.pbio.2005747), 2018-06-06
Supplement: pbio.2005747.s013.pdf [file pbio.2005747.s013.pdf]

| Gene             | <i>Vg-like A</i><br>dsiRNA<br>fragment | Proportion of<br>correctly<br>aligned<br>nucleotides | Alignment of the longest<br>aligned fragment                                           |
|------------------|----------------------------------------|------------------------------------------------------|----------------------------------------------------------------------------------------|
| <i>Vg1</i>       | 1                                      | 68%                                                  | accatgaacacacaacagctgactgaa<br>-CCATCAACAGGCTACAGCATACTAT-<br>**** * * * * * * * * * * |
| <i>Vg1</i>       | 2                                      | 64%                                                  | cgcaagaattaaatccgcgaggtgttc<br>-CCATGAATTGCGTCCGTGAGACTTT-<br>** * * * * * * * * * *   |
| <i>Vg1</i>       | 3                                      | 60%                                                  | gagtgtcagtcgaggtcccttagcggc<br>-CGAGTACGTTCAAGTTCCTTTCAG-<br>* * * * * * * * * * *     |
| <i>Vg2</i>       | 1                                      | 48%                                                  | CGTCCC GATGGTAACTCATAGCATT<br>-ATCAACAGGCTACAGCATACTAT-<br>* * * * * * * * * *         |
| <i>Vg2</i>       | 2                                      | 52%                                                  | TCATAGCATTGGGCTTGTTTCAGCTTTC<br>-CCATGAATTGCGTCCGTGAGACTTT-<br>* * * * * * * * * *     |
| <i>Vg2</i>       | 3                                      | 60%                                                  | TCGACTGTCTTCCCTGCTTCTTTGTCGC<br>-CGAGTACGTTCAAGTTCCTTTCAG-<br>*** * * * * * * * * * *  |
| <i>Vg3</i>       | 1                                      | 28%                                                  | GGAACCACATGGTGTT<br>-CTACAGCATACTAT-<br>* * * * * * * * *                              |
| <i>Vg3</i>       | 2                                      | 60%                                                  | gtaatgtattgtgtat atgagaact<br>-CCATGAATTGCGTCCGTGAGACTTT-<br>*** * * * * * * * * * *   |
| <i>Vg3</i>       | 3                                      | 32%                                                  | atgtcccttttccc<br>-AGTTCCTTTCAG-<br>** * * * * * *                                     |
| <i>Vg-like A</i> | 1                                      | 100%                                                 | ACCATCAACAGGCTACAGCATACTATG<br>-CCATCAACAGGCTACAGCATACTAT-<br>*****                    |
| <i>Vg-like A</i> | 2                                      | 100%                                                 | ACCATGAATTGCGTCCGTGAGACTTTA<br>-CCATGAATTGCGTCCGTGAGACTTT-<br>*****                    |
| <i>Vg-like A</i> | 3                                      | 100%                                                 | ACGAGTACGTTCAAGTTCCTTTCAGC<br>-CGAGTACGTTCAAGTTCCTTTCAG-<br>*****                      |
| <i>Vg-like B</i> | 1                                      | 68%                                                  | gcgttctatagacttcagcatcgtata<br>-CCATCAACAGGCTACAGCATACTAT-<br>* * * * * * * * * *      |
| <i>Vg-like B</i> | 2                                      | 64%                                                  | accaggatttttcgagcctgtggcttaa<br>-CCATGAATTGCGTCCGTGAGACTTT-<br>*** * * * * * * * * *   |
| <i>Vg-like B</i> | 3                                      | 44%                                                  | gcgagttcattagactt<br>-CGAGTACGTTCAAGT<br>***** * * * * *                               |
| <i>Vg-like C</i> | 1                                      | 44%                                                  | gcctacattatattatc<br>-GCTACAGCATACTAT--<br>***** * * * *                               |

|                  |   |     |                                                                  |
|------------------|---|-----|------------------------------------------------------------------|
| <i>Vg-like C</i> | 2 | 44% | atcacgtacgttataattatc<br>-TIGCGTCCGTGAGACTTT--<br>* *** ** * * * |
| <i>Vg-like C</i> | 3 | 36% | caaattcgtgggcagtc<br>--AGTTCCTTTGCAG--<br>* *** * ****           |
