# Supplementary material for: Vitellogenin-like A–associated shifts in social cue responsiveness regulate behavioral task specialization in an ant
Source: PubMed Central journal article supplement (PMC5991380; doi:10.1371/journal.pbio.2005747), 2018-06-06
Supplement: pbio.2005747.s014.pdf [file pbio.2005747.s014.pdf]

| <b>Gene</b>            | <b>Direction</b> | <b>Sequence</b>         |
|------------------------|------------------|-------------------------|
| <i>Vg-like A</i>       | 5' to 3'         | TGGAGATCATGCCAAACGAG    |
|                        | 3' to 5'         | CGTTGAGACTGGACCATGAG    |
| <i>Conventional Vg</i> | 5' to 3'         | TCTCTTCAAGACGCCAGAATTAG |
|                        | 3' to 5'         | CCGACGATACCAGAACGATAAG  |
| <i>VgM (Vg2)</i>       | 5' to 3'         | GTTGATGGCAGACCAGACGA    |
|                        | 3' to 5'         | TGAAACAGAGCTCGTCACCC    |
| <i>VgM (Vg3)</i>       | 5' to 3'         | ACTTTGGCACTCGGAGGAAG    |
|                        | 3' to 5'         | TTGTGCAAGCTTCTCAACGC    |
| <i>Vg-like B</i>       | 5' to 3'         | TGCTCGAGACGCCTCAATTT    |
|                        | 3' to 5'         | TGCGTATTCCACAGGGCATT    |
| <i>Vg-like C</i>       | 5' to 3'         | TTCTCGCAATCGTCCTTGCT    |
|                        | 3' to 5'         | ACTCCTCCAGACTCCTCGAC    |
| <i>Alpha tubulin</i>   | 5' to 3'         | TCCATCGAACCGTAGAGAGG    |
|                        | 3' to 5'         | GCAACCTGGATATCGAAAGG    |
| <i>GDAPH</i>           | 5' to 3'         | TCATCTTCGGTGTAGCCAG     |
|                        | 3' to 5'         | CGACTTGACGGTTCGACTTG    |
