# Supplementary material for: Vitellogenin-like A–associated shifts in social cue responsiveness regulate behavioral task specialization in an ant
Source: PLOS journal article supplement (doi:10.1371/journal.pbio.2005747), 2018-06-06

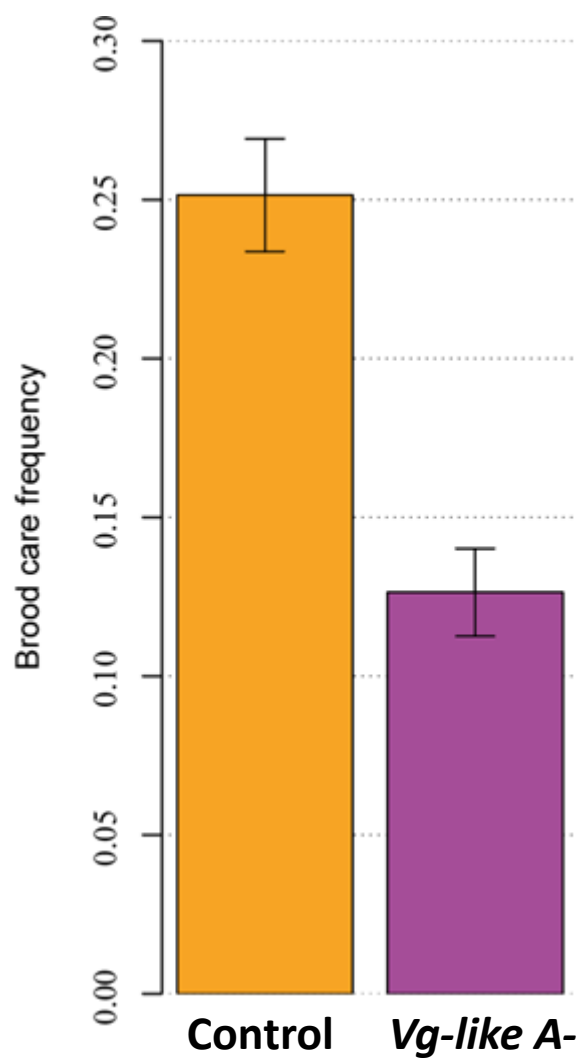

Supplement: S3 (10.1371/journal.pbio.2005747.s003) [file journal.pbio.2005747.s003.pdf]
