# Supplementary material for: Vitellogenin-like A–associated shifts in social cue responsiveness regulate behavioral task specialization in an ant
Source: PLOS journal article supplement (doi:10.1371/journal.pbio.2005747), 2018-06-06
Supplement: S11 (10.1371/journal.pbio.2005747.s011) [file journal.pbio.2005747.s011.pdf]

**Behaviors****Positions**

Resting

On the brood pile

Walking

Near the brood pile (One body length)

Grooming (Self, brood, adult worker queen)

Inside the nest

Feeding (Brood, adult worker, queen)

Near the entrance (One body length)

Carrying (Brood, adult worker queen)

In the nest entrance

Antennation (Nest, brood, adult worker, queen)

Outside chamber 1

Being fed

Outside chamber 2

Being groomed

Outside chamber 3

Eating
